# Supplementary material for: Continuous streamflow prediction in ungauged basins: Long Short-Term Memory Neural Networks clearly outperform hydrological models
Source: Copernicus journal article supplement (doi:10.5194/hess-2022-295), 2022-08-16
Supplement: Supplementary file 1 [file hess-2022-295-supplement.pdf]

# **Supplementary materials for *Continuous prediction in ungauged basins: Long Short-Term Memory Neural Networks clearly outperform hydrological models***

5 Richard Arsenault<sup>1</sup>, Jean-Luc Martel<sup>1</sup>, Frédéric Brunet<sup>1</sup>, François Brissette<sup>1</sup>, Juliane Mai<sup>2</sup>

<sup>1</sup>Hydrology, Climate and Climate Change Laboratory, École de technologie supérieure, 1100 Notre-Dame West, Montréal, Québec, H3C 1K3, Canada

<sup>2</sup>Department of Civil and Environmental Engineering, University of Waterloo, 200 University Ave W, Waterloo, Ontario, N2L 3G1, Canada

10 *Correspondence to:* Richard Arsenault (richard.arsenault@etsmtl.ca)

## Contents:

- 1- Figure S1 - LSTM model structure implemented in this study
- 2- Table S1 – HSAMI hydrological model parameters
- 3- Table S2 – HMETs hydrological model parameters
- 15 4- Table S3 – GR4JCN hydrological model parameters

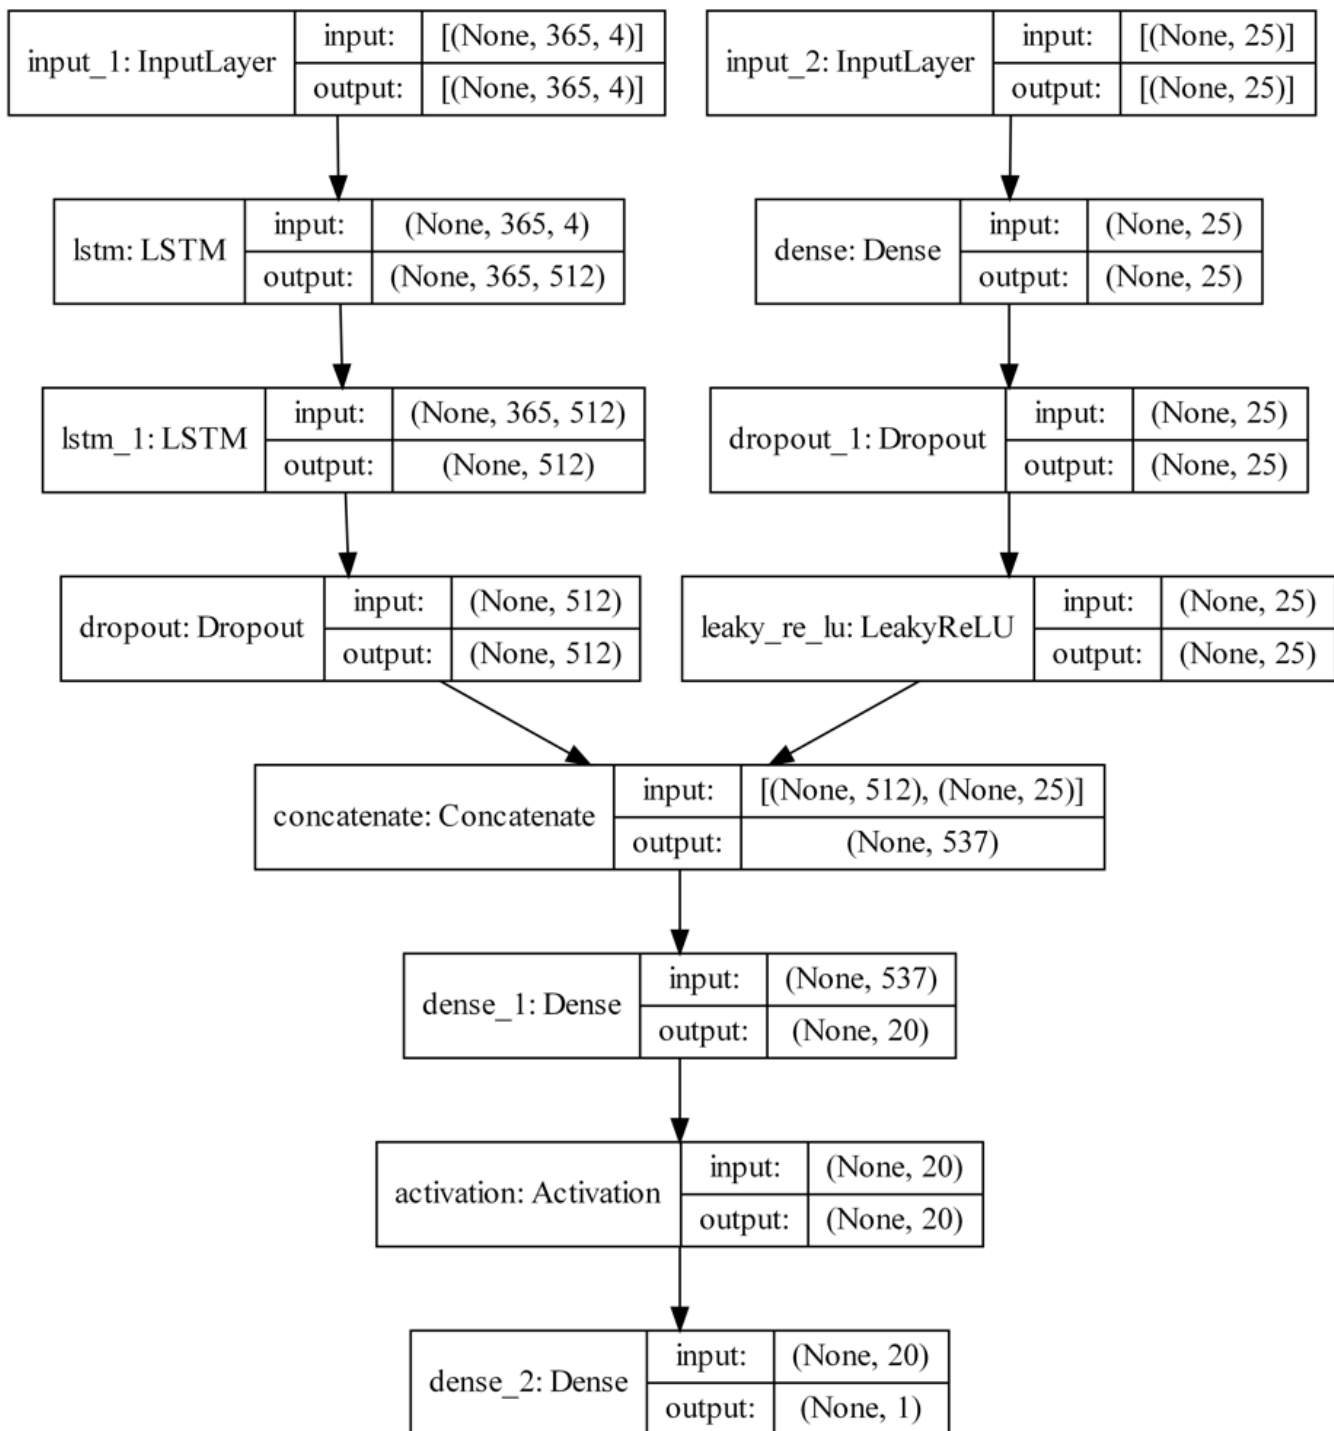

20 **Figure S1: LSTM model structure implemented in this study. Numbers in parentheses in the input and output fields of each model represent the size of the inputs and outputs, respectively.**

**Table S1: HSAMI model parameters**

| <b>Parameter</b> | <b>Units</b> | <b>Description</b>                                                                                     |
|------------------|--------------|--------------------------------------------------------------------------------------------------------|
| X <sub>1</sub>   | -            | Summer PET scaling factor                                                                              |
| X <sub>2</sub>   | -            | Proportion of summer PET corresponding to winter PET                                                   |
| X <sub>3</sub>   | cm/°C/d      | Degree-day factor for daytime snowmelt                                                                 |
| X <sub>4</sub>   | cm/°C/d      | Degree-day factor for nighttime snowmelt                                                               |
| X <sub>5</sub>   | °C           | Threshold temperature for daytime snowmelt initiation                                                  |
| X <sub>6</sub>   | °C           | Threshold temperature for nighttime snowmelt initiation                                                |
| X <sub>7</sub>   | °C           | Minimum temperature threshold to accelerate rain induced snowmelt                                      |
| X <sub>8</sub>   | -            | Parameter that relates snowmelt conditions to the snow covered proportion of the watershed             |
| X <sub>9</sub>   | -            | Parameter that relates freezing conditions to the proportion of surface runoff                         |
| X <sub>10</sub>  | cm/d         | Daily rainfall rate necessary for 50% of surface runoff when the soil is completely dry                |
| X <sub>11</sub>  | cm/d         | Daily rainfall rate necessary for 50% of surface runoff when the soil is saturated                     |
| X <sub>12</sub>  | cm           | Water in unsaturated zone which cannot flow by gravity                                                 |
| X <sub>13</sub>  | cm           | Maximum water quantity which can be contained in the unsaturated zone                                  |
| X <sub>14</sub>  | cm           | Maximum water quantity which can be contained in the aquifer before turning into surface runoff        |
| X <sub>15</sub>  | -            | Surface water proportion which flows through the intermediary hydrograph in normal conditions          |
| X <sub>16</sub>  | -            | Surface water proportion which flows through the intermediary hydrograph when unsaturated zone is full |
| X <sub>17</sub>  | cm/d         | Outflow rate from the unsaturated zone to the saturated zone                                           |
| X <sub>18</sub>  | cm/d         | Outflow rate from the saturated zone which constitutes the base flow rate                              |
| X <sub>19</sub>  | cm/d         | Outflow rate from the interflow storage which constitutes the interflow rate                           |
| X <sub>20</sub>  | d            | Time to peak of surface unit hydrograph                                                                |
| X <sub>21</sub>  | -            | Shape parameter of the surface unit hydrograph                                                         |
| X <sub>22</sub>  | d            | Time to peak of the interflow unit hydrograph                                                          |
| X <sub>23</sub>  | -            | Shape parameter of the interflow unit hydrograph                                                       |

25

30

35

**Table S2: HMETs model parameters**

| Parameter    | Units            | Description                                                                                     |
|--------------|------------------|-------------------------------------------------------------------------------------------------|
| $ddf_{min}$  | mm/°C/d          | Minimum degree-day-factor                                                                       |
| $ddf_{plus}$ | mm/°C/d          | $ddf_{plus}$ : Maximum degree-day-factor ( $ddf_{min} + ddf_{plus} = ddf_{max}$ )               |
| $T_{bm}$     | °C               | Base melting temperature                                                                        |
| $K_{cum}$    | mm <sup>-1</sup> | Empirical parameter for the calculation of the degree-day-factor                                |
| $fc_{min}$   | -                | Minimum fraction for the snowpack water retention capacity                                      |
| $fc_{plus}$  | -                | Maximum fraction of the snowpack water retention capacity ( $fc_{min} + fc_{plus} = fc_{max}$ ) |
| $C_{cum}$    | mm <sup>-1</sup> | Parameter for the calculation of water retention capacity                                       |
| $T_{bf}$     | °C               | Base refreezing temperature                                                                     |
| $K_f$        | mm/°C/d          | Degree-day factor for refreezing                                                                |
| $Fe$         | -                | Empirical exponent for the freezing equation                                                    |
| $ET_{eff}$   | -                | Fraction of the potential evapotranspiration                                                    |
| $c_r$        | -                | Fraction of the water for surface and delayed runoff                                            |
| $c_{vp}$     | -                | Fraction of the water for groundwater recharge                                                  |
| $c_v$        | -                | Fraction of the water for hypodermic flow                                                       |
| $c_p$        | -                | Fraction of the water for groundwater flow                                                      |
| $LV_{max}$   | mm               | Maximum level of the vadose zone                                                                |
| $LP_{max}$   | mm               | Maximum level of the phreatic zone                                                              |
| $\alpha_1$   | -                | Shape parameter $\alpha$ for the gamma distribution used on the surface unit hydrograph         |
| $\beta_1$    | -                | Rate parameter $\beta$ for the gamma distribution used on the surface unit hydrograph           |
| $\alpha_2$   | -                | Shape parameter $\alpha$ for the gamma distribution used on the delayed unit hydrograph         |
| $\beta_2$    | -                | Rate parameter $\beta$ for the gamma distribution used on the delayed unit hydrograph           |

**Table S3: GR4JCN model parameters**

| Parameter | Units   | Description                                         |
|-----------|---------|-----------------------------------------------------|
| $X_1$     | mm      | Production storage capacity                         |
| $X_2$     | mm      | Groundwater exchange coefficient                    |
| $X_3$     | mm      | One day ahead maximum capacity of the routing store |
| $X_4$     | d       | Time base of unit hydrograph                        |
| $C_{TG}$  | -       | Ponderation coefficient of the thermic state        |
| $K_f$     | mm/°C/d | Degree-day factor                                   |
